# Supplementary material for: Microwave-assisted decarboxylation of bicyclic 2-pyridone scaffolds and identification of Aβ-peptide aggregation inhibitors
Source: Royal Society of Chemistry journal article supplement (doi:10.1039/b503294f), 2005-01-01

## Supporting information

### Microwave-assisted decarboxylation of bicyclic 2-pyridone scaffolds and identification of A $\beta$ -peptide aggregation inhibitors

*Veronica Åberg<sup>a</sup>, Fredrik Norman<sup>a</sup>, Erik Chorell<sup>a</sup>, Andreas Westermark<sup>a</sup>,  
Anders Olofsson<sup>b</sup>, A. Elisabeth Sauer-Eriksson<sup>b</sup>, Fredrik Almqvist<sup>a\*</sup>*

<sup>a</sup>Organic Chemistry, Department of Chemistry, Umeå University, SE-90187 Umeå, Sweden

<sup>b</sup>Umeå Centre for Molecular Pathogenesis, Umeå University, SE-90187 Umeå, Sweden

[fredrik.almqvist@chem.umu.se](mailto:fredrik.almqvist@chem.umu.se)

#### Contents

(Page 2-Page 18): <sup>13</sup>C NMR spectra of compounds **9b-f**, **10b-f**, and **12a-g**

9b  
04-10-06

Page 2

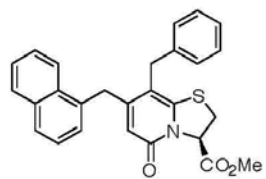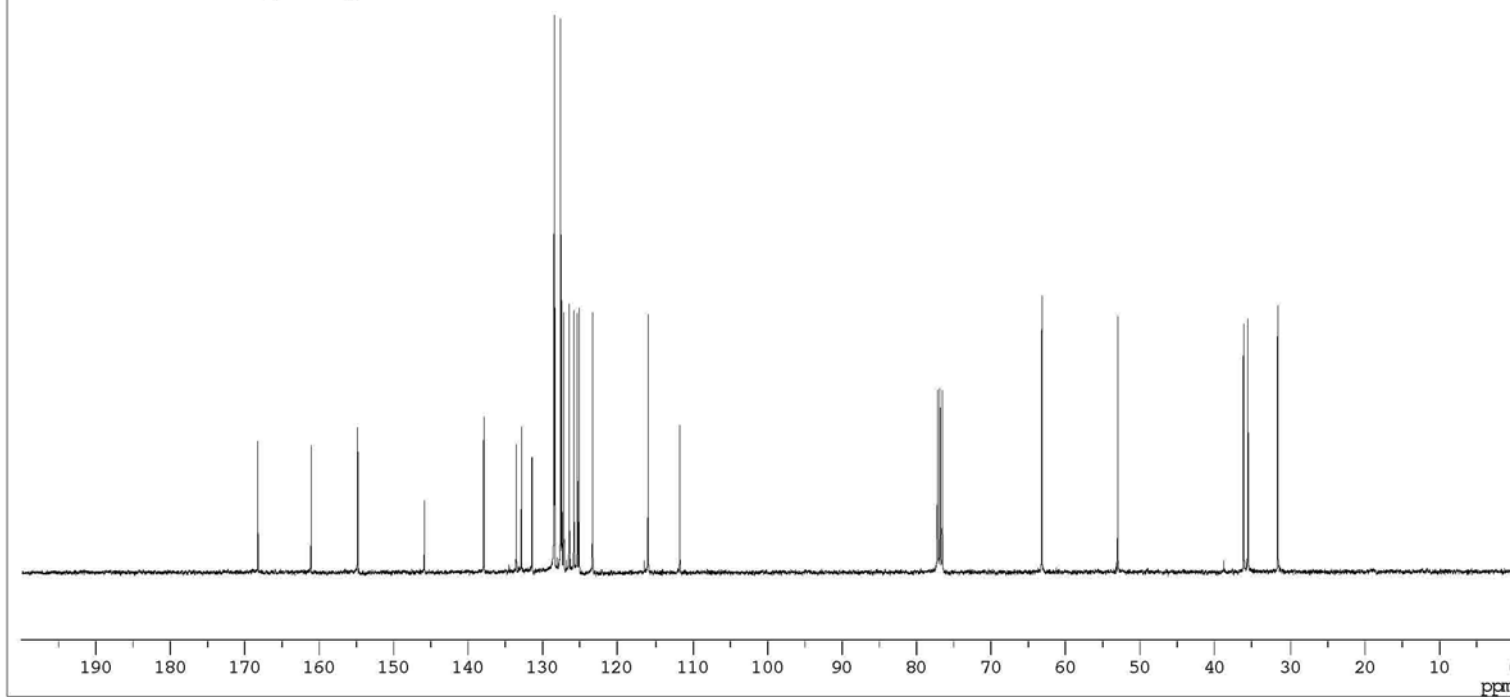

9c  
04-10-06

Page 3

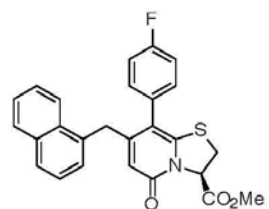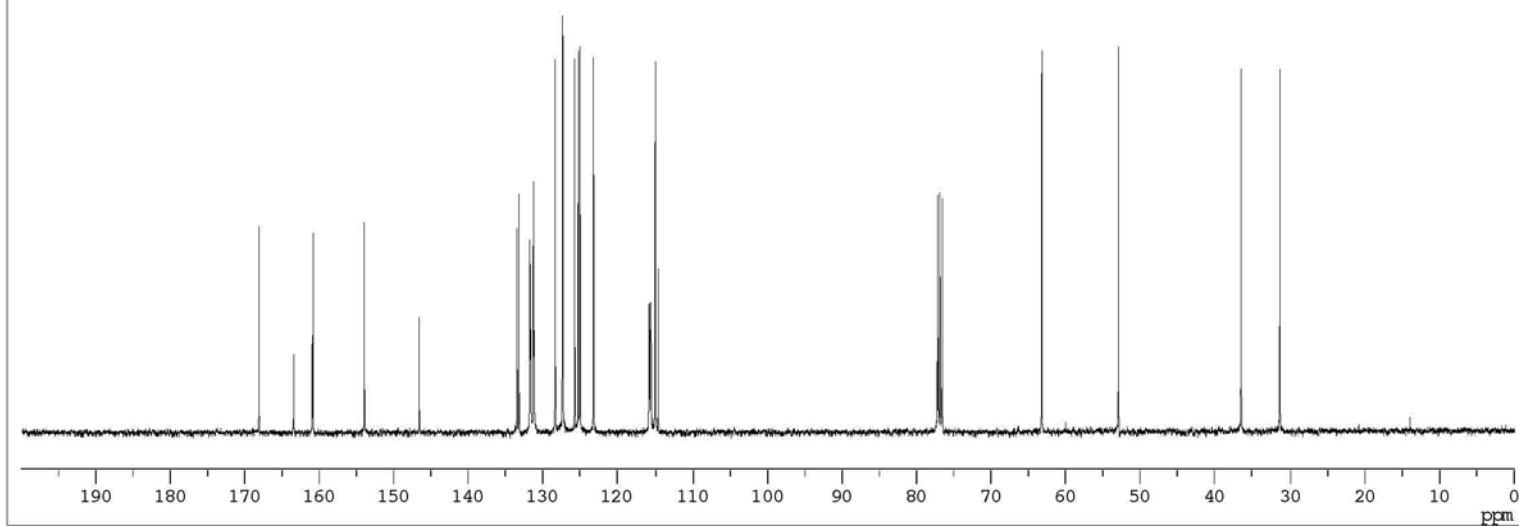

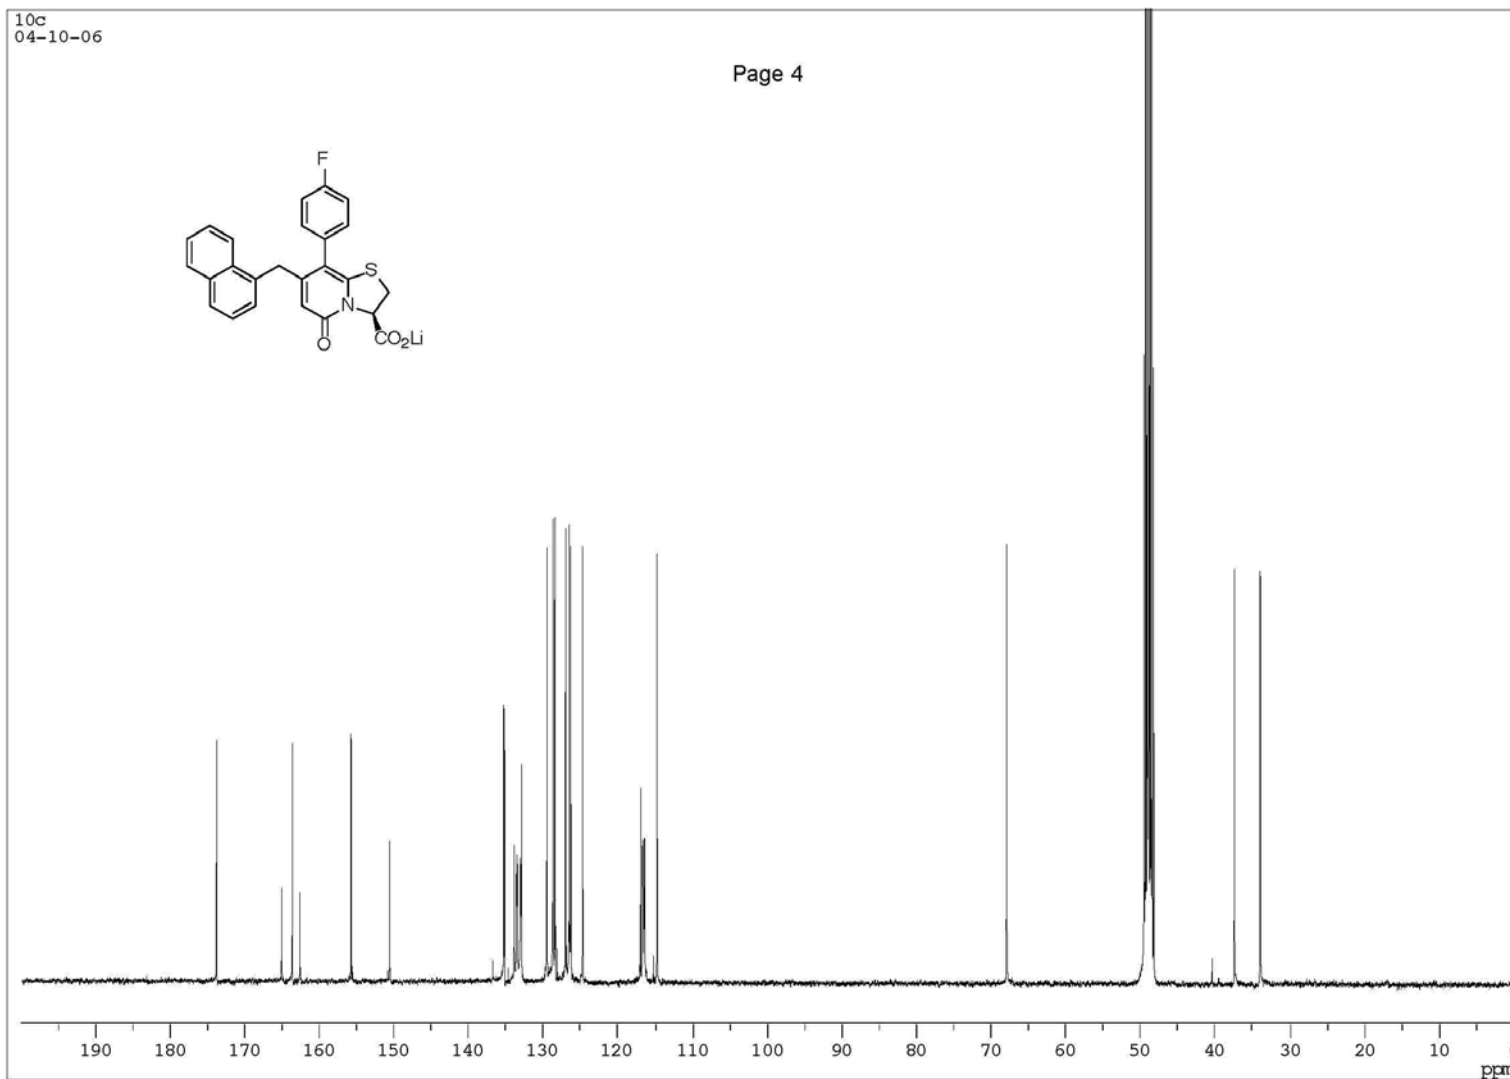

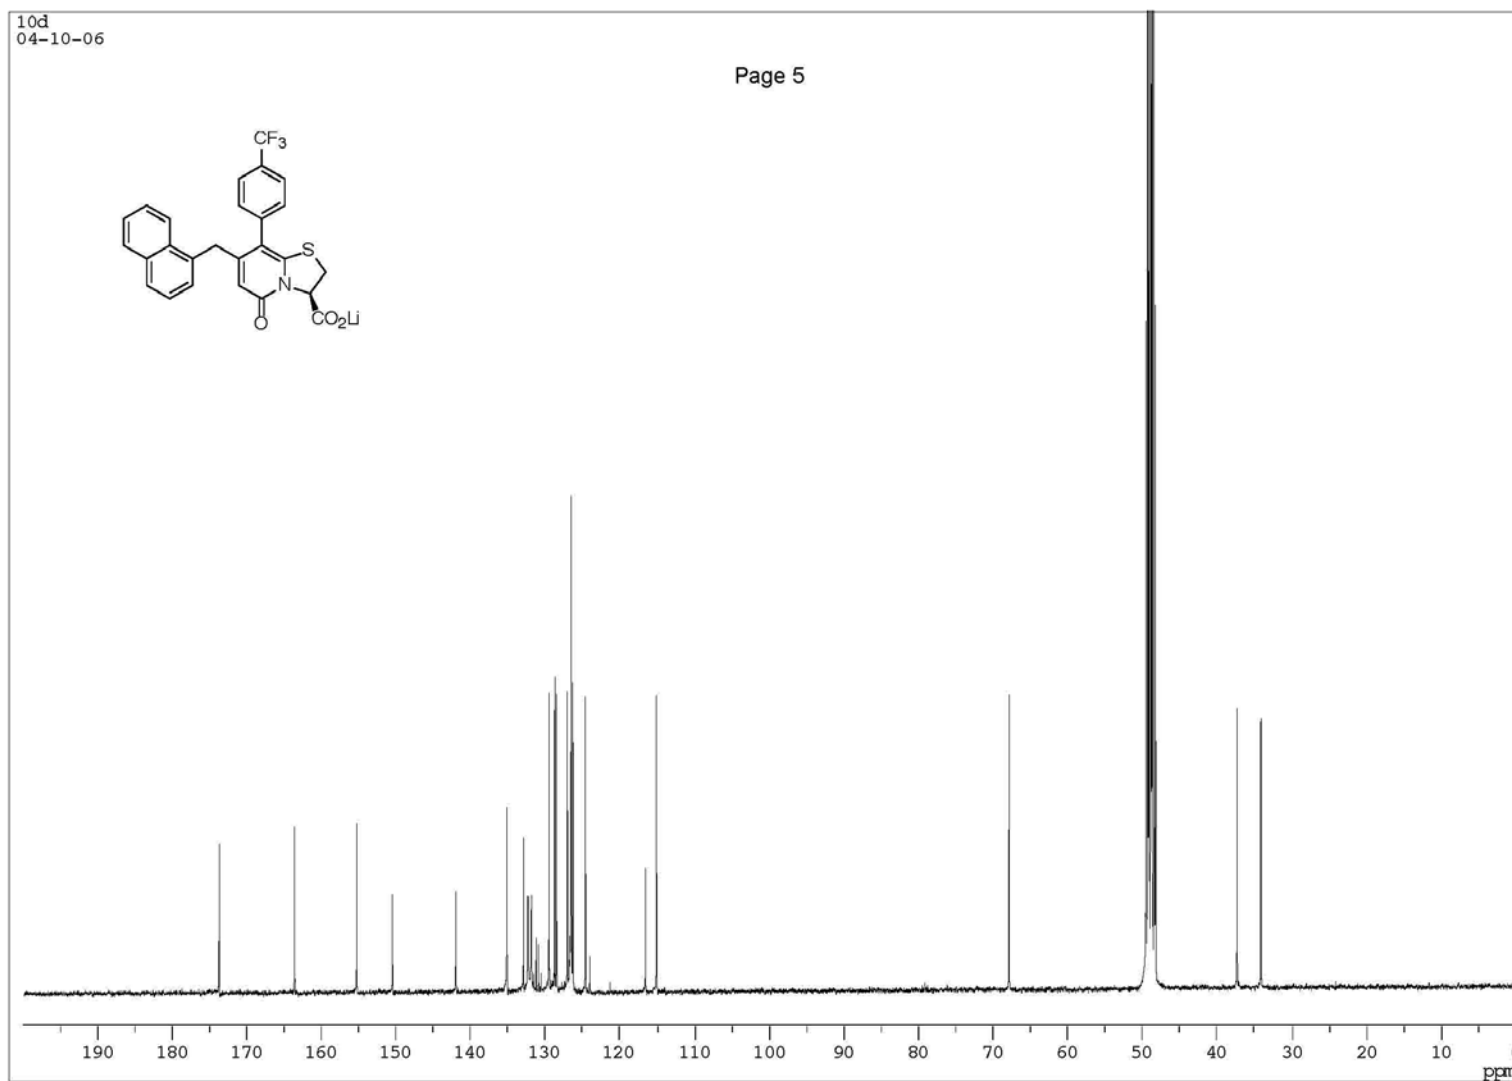

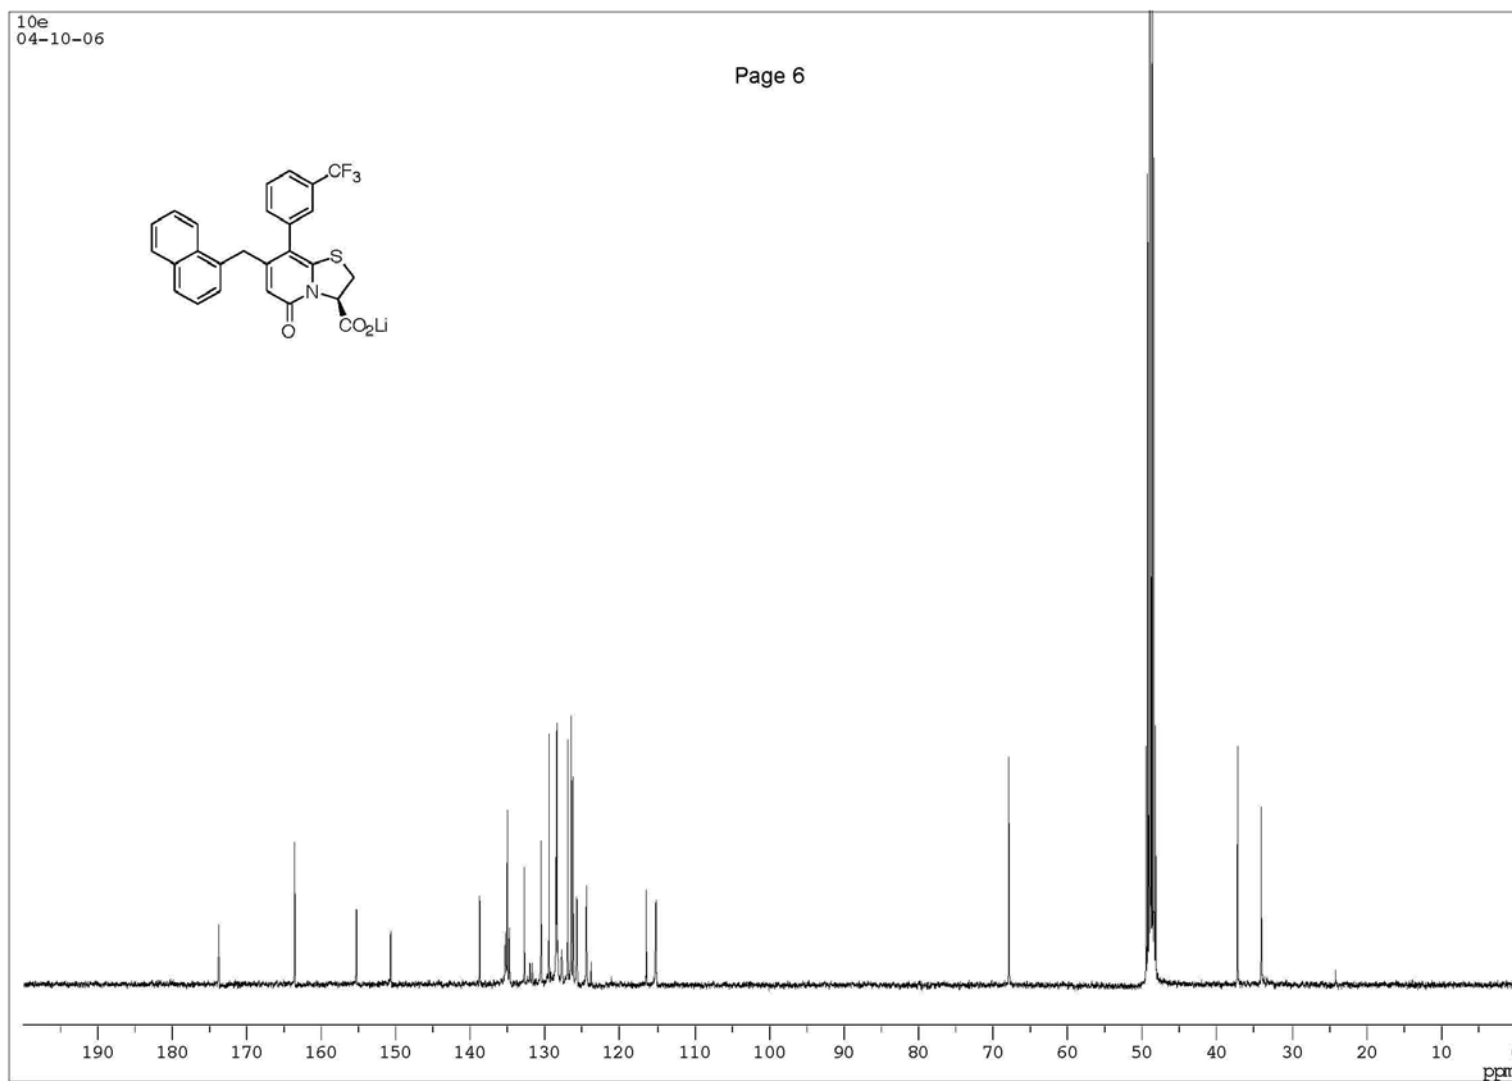

10b  
04-10-06

Page 7

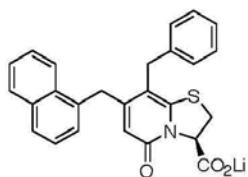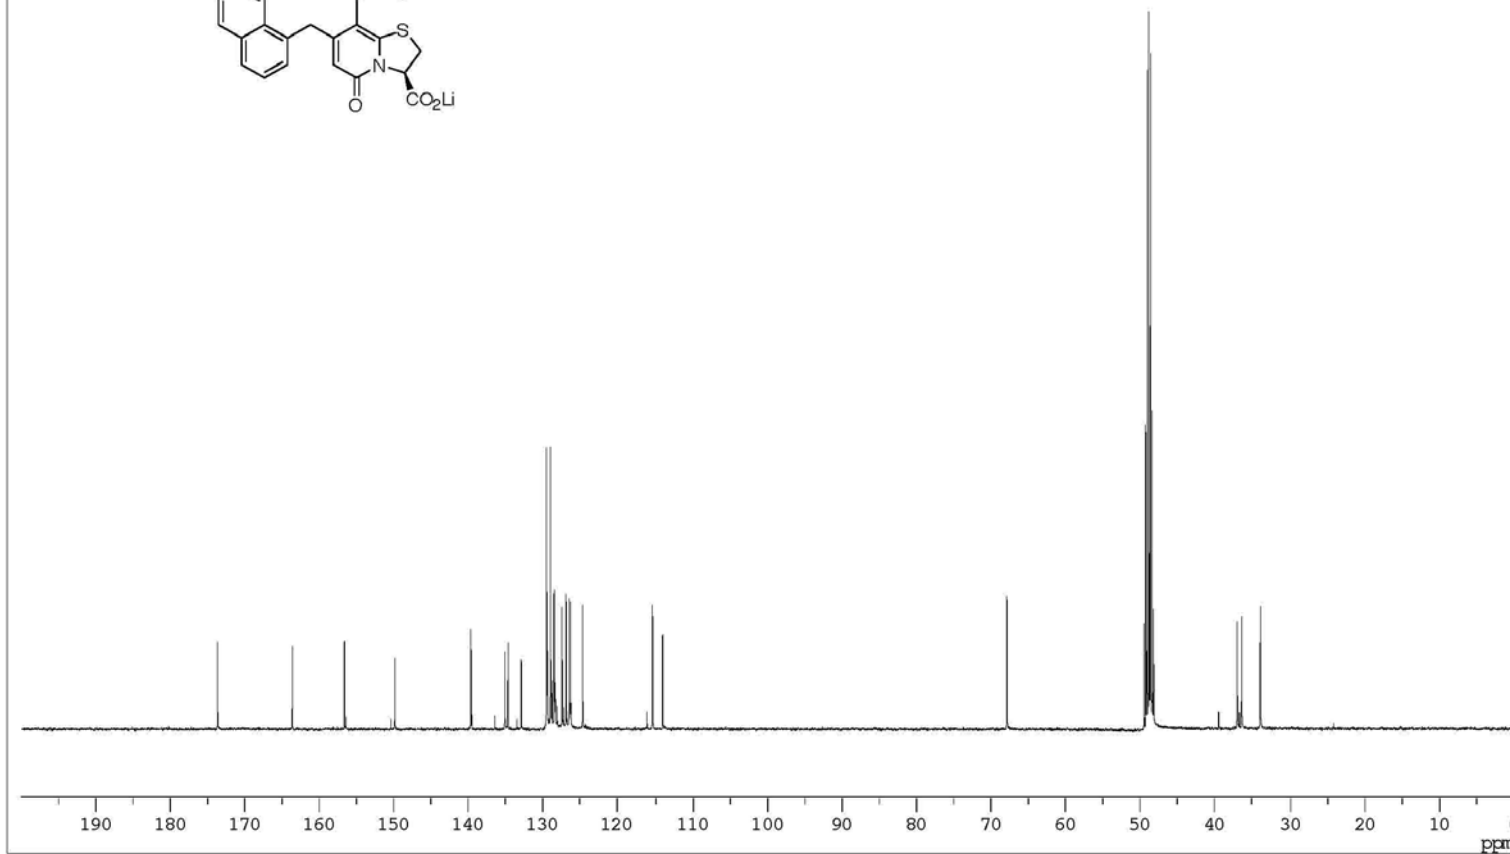

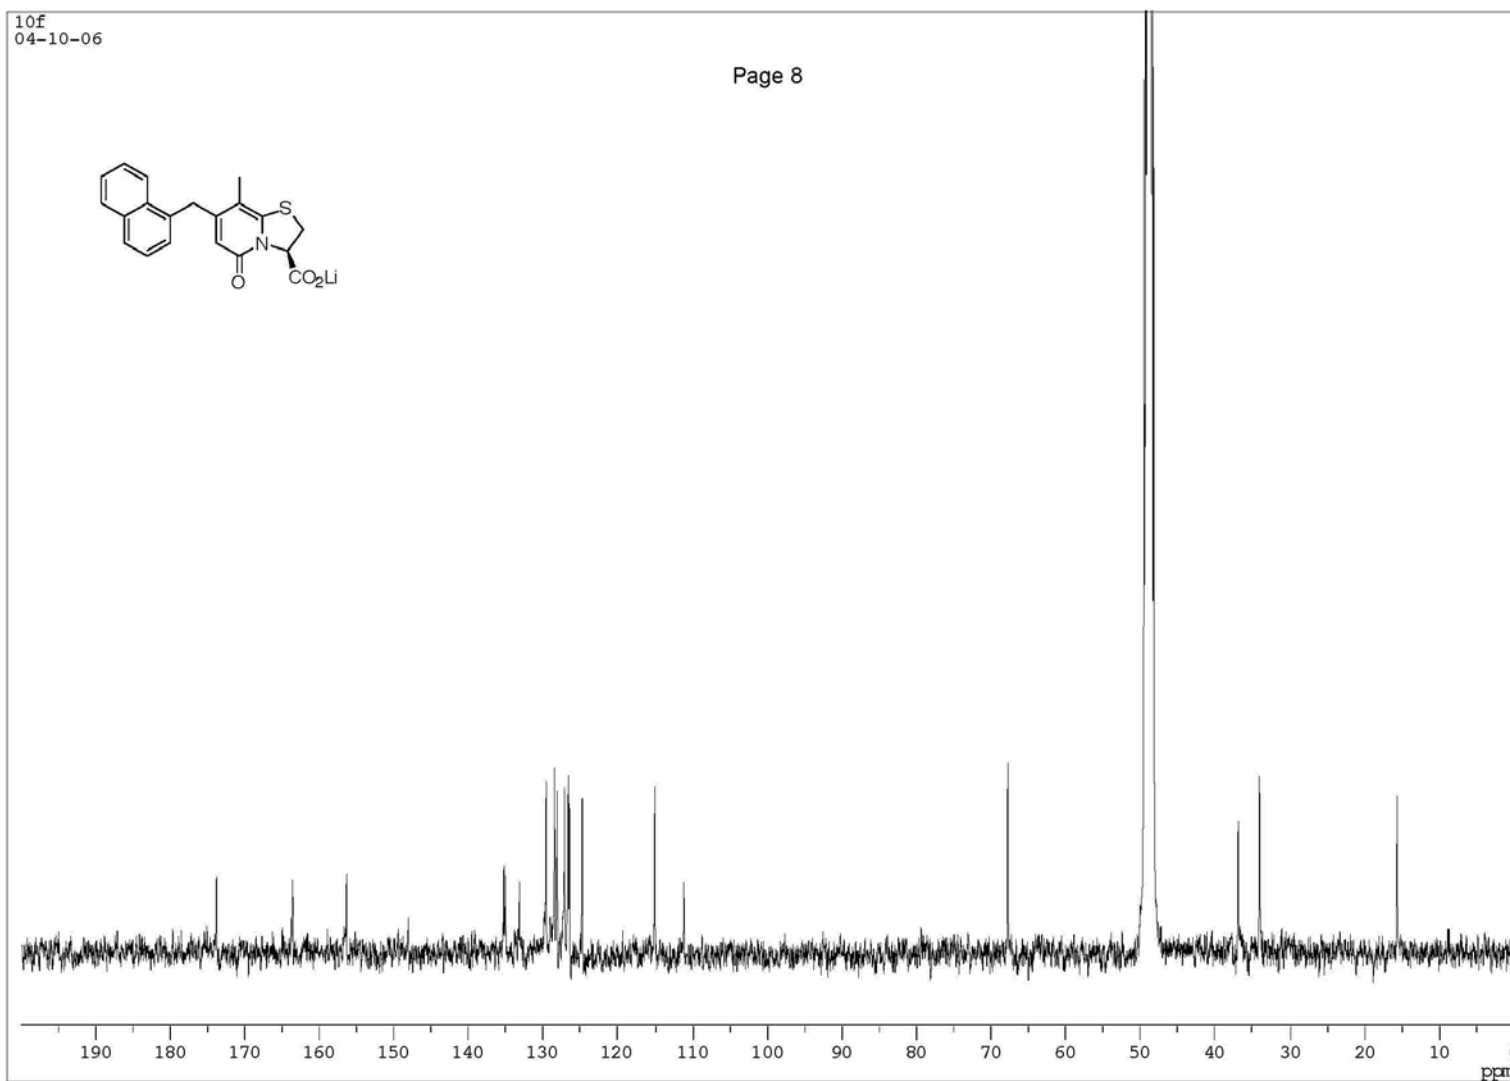



12a  
04-10-06

Page 9

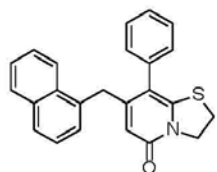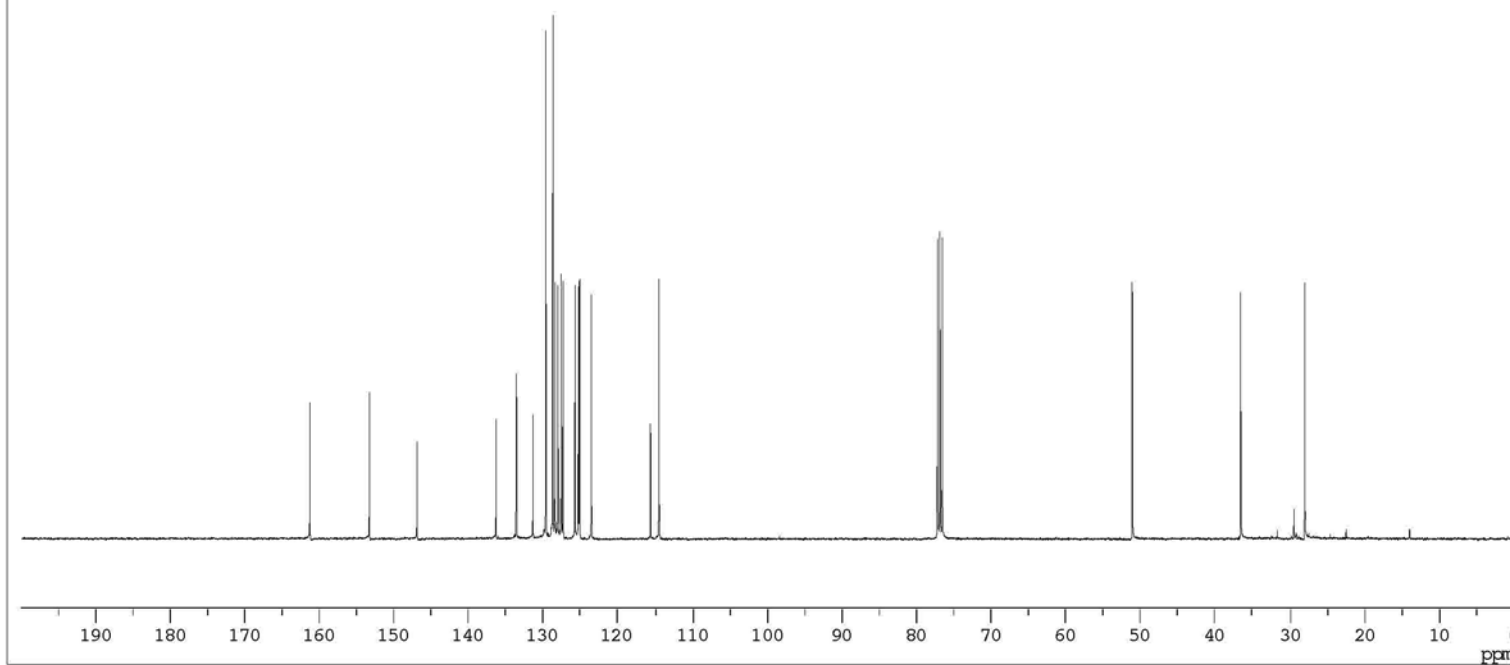

12b  
04-10-06

Page 10

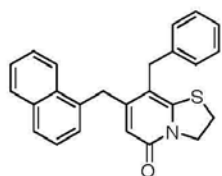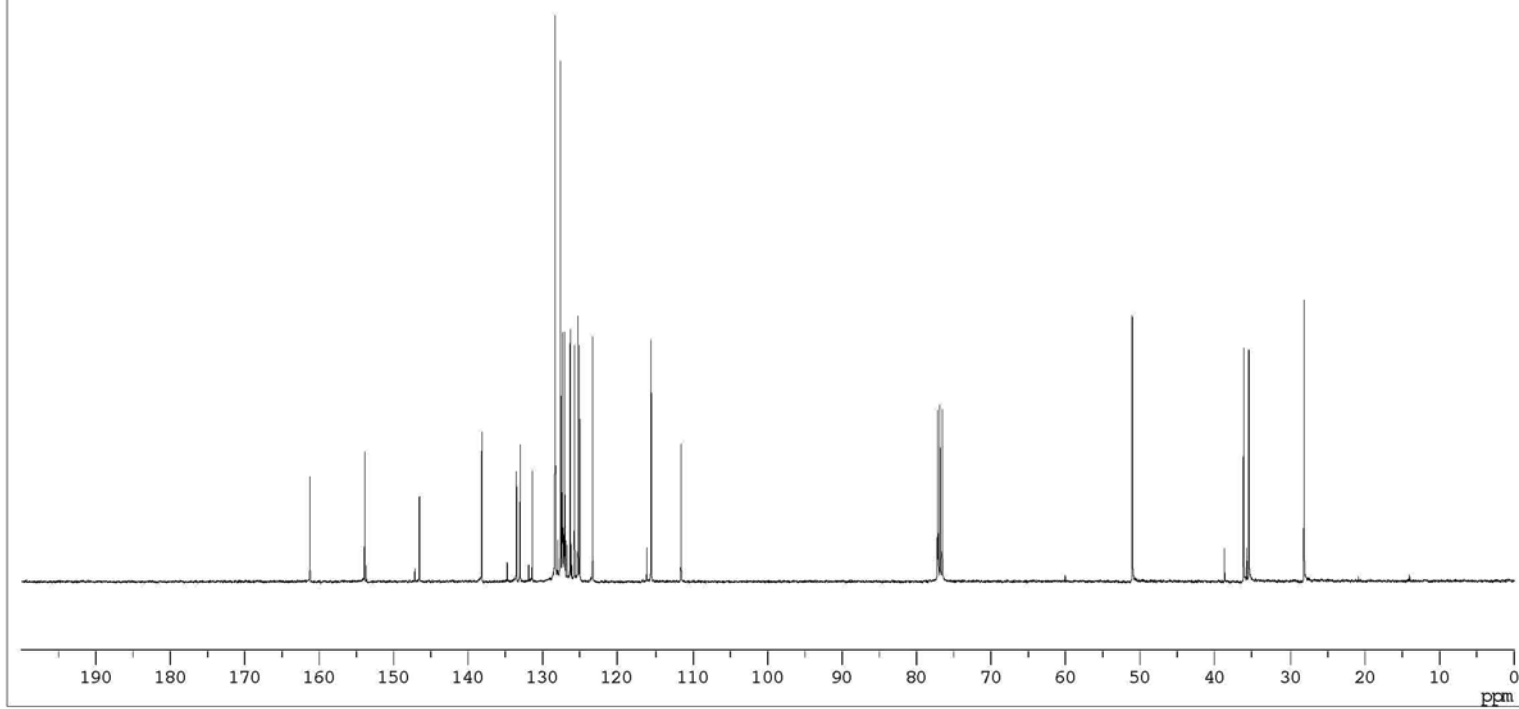

12c  
04-10-06

Page 11

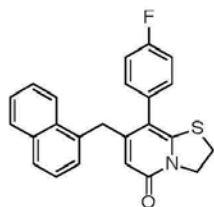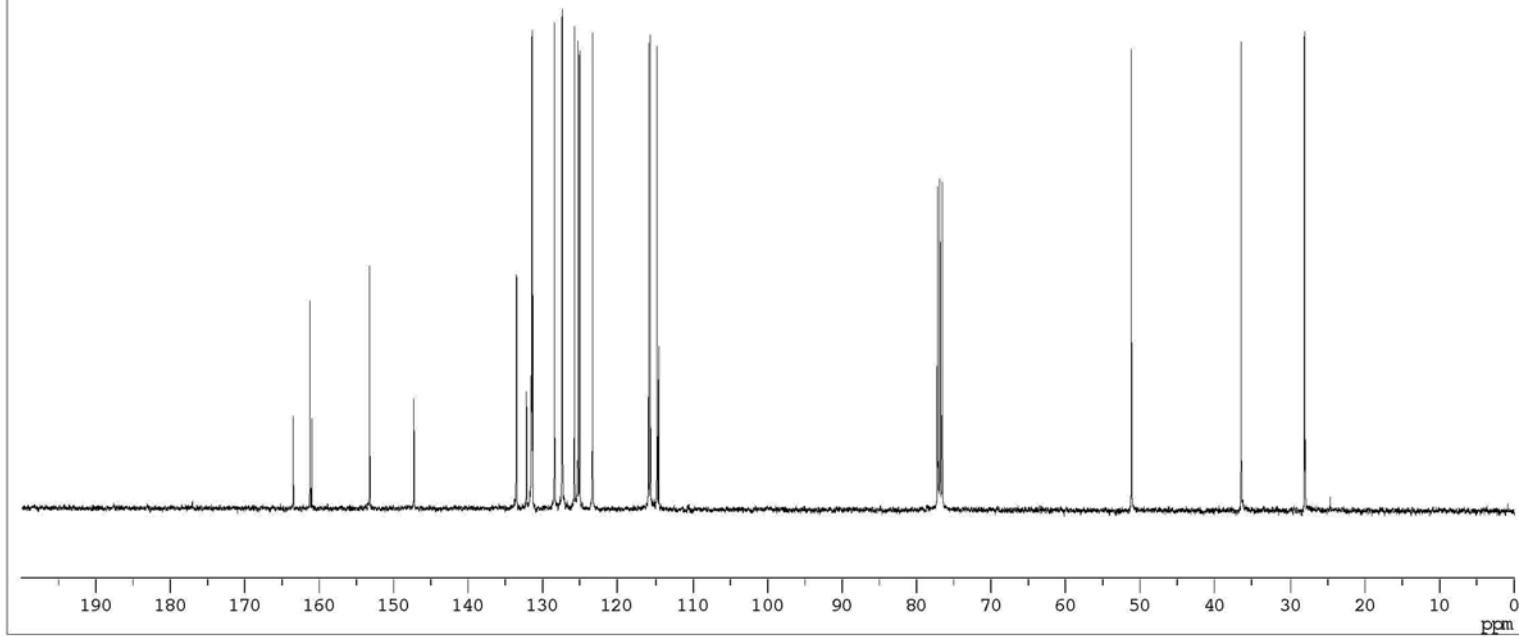

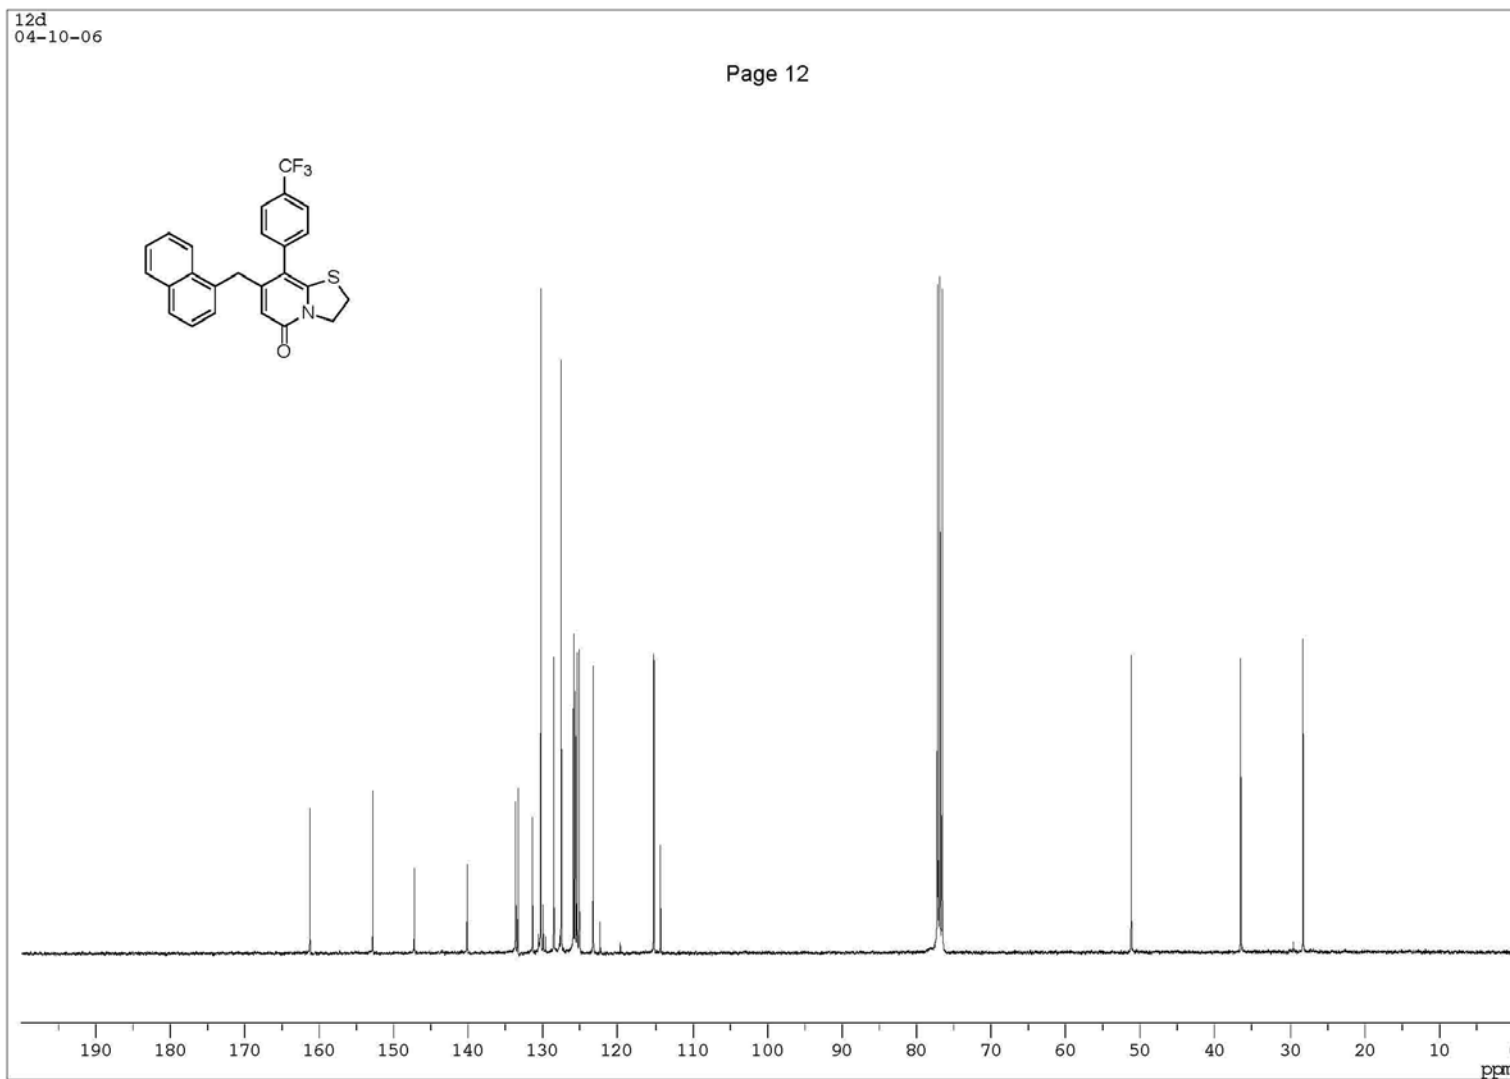

12e  
04-10-06

Page 13

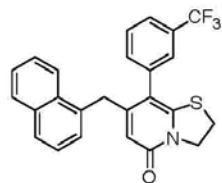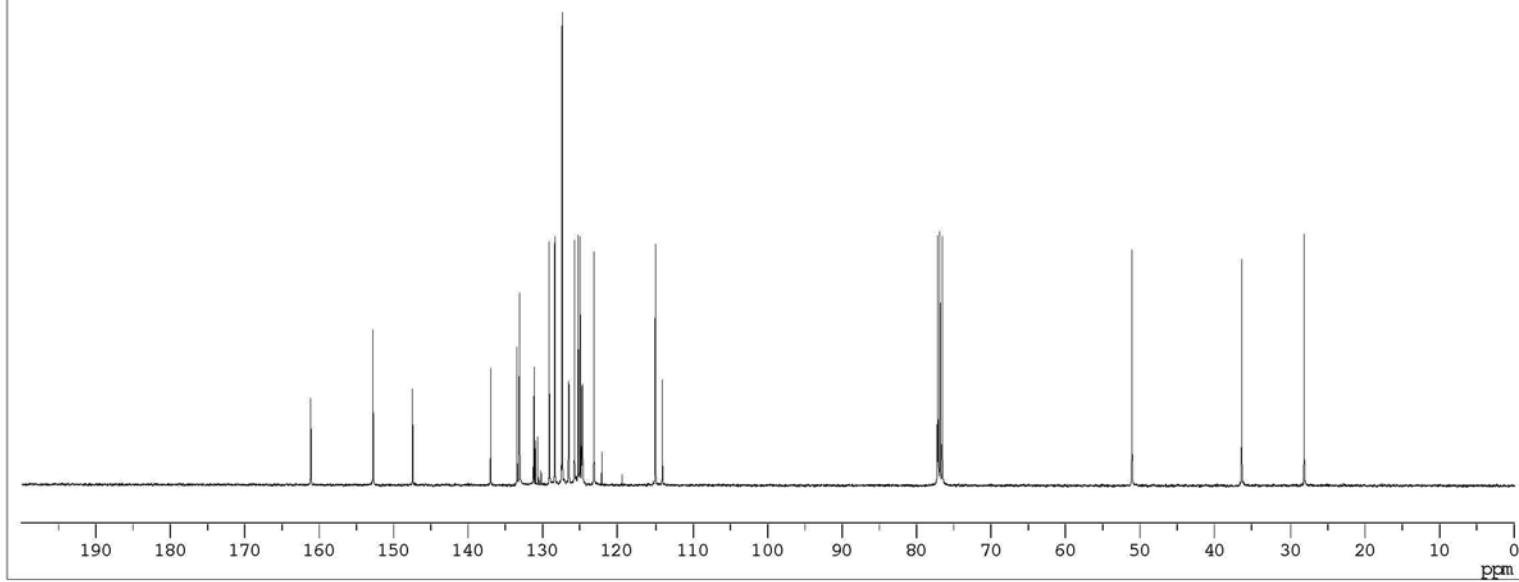

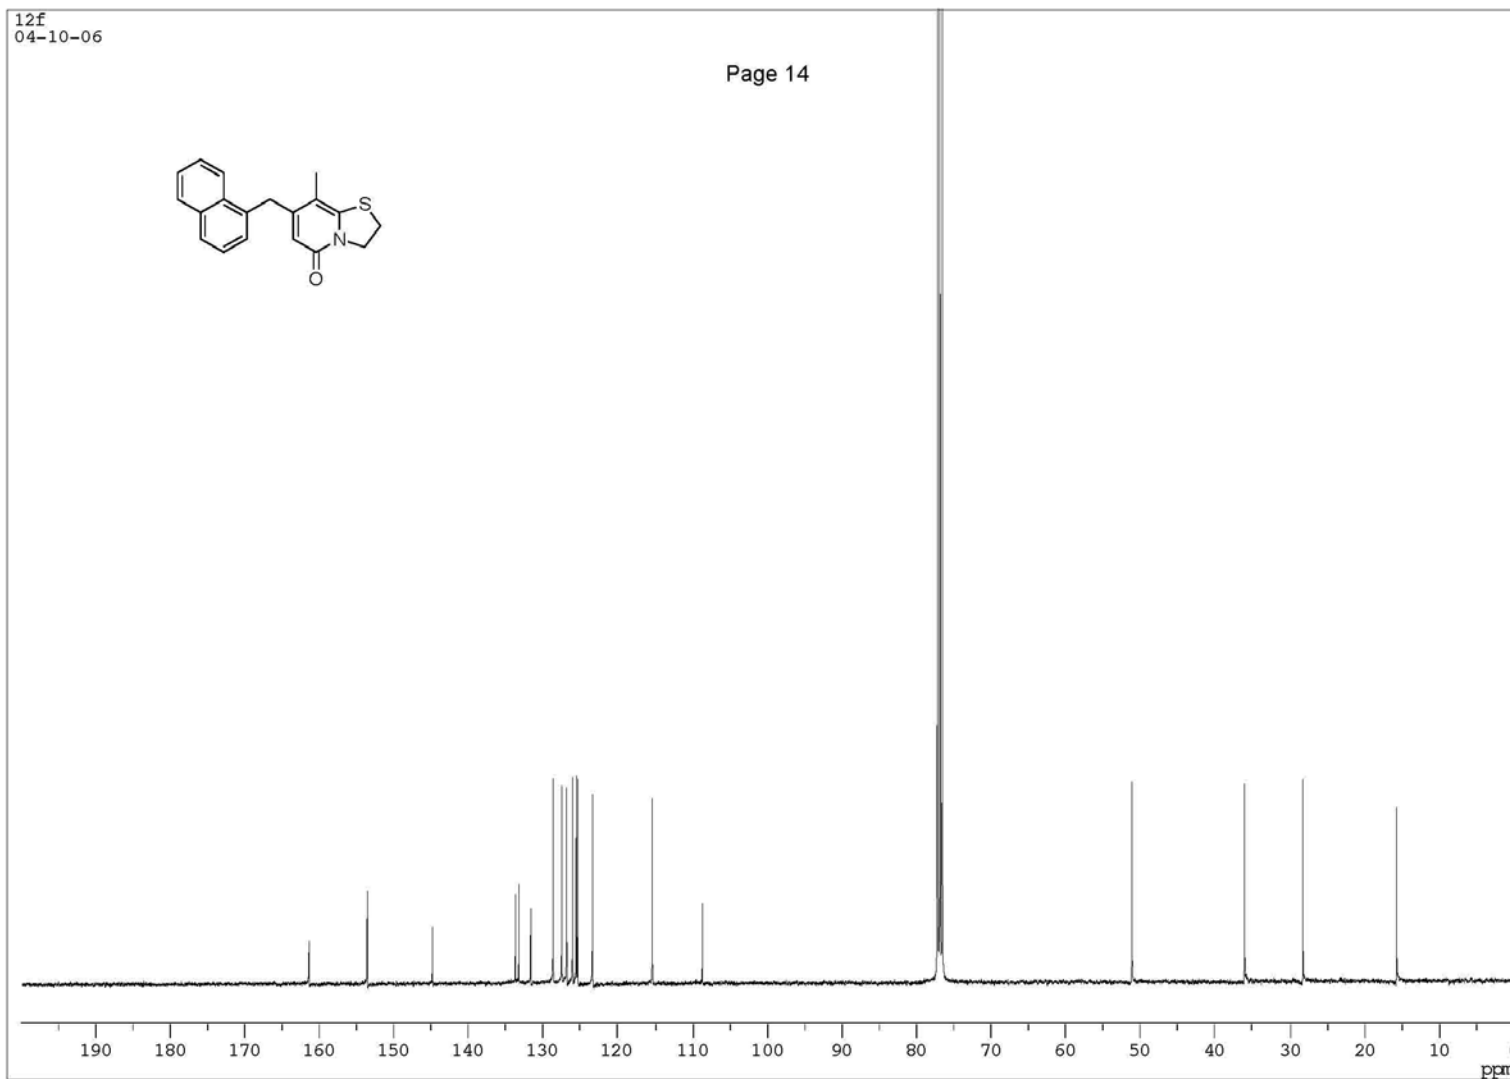

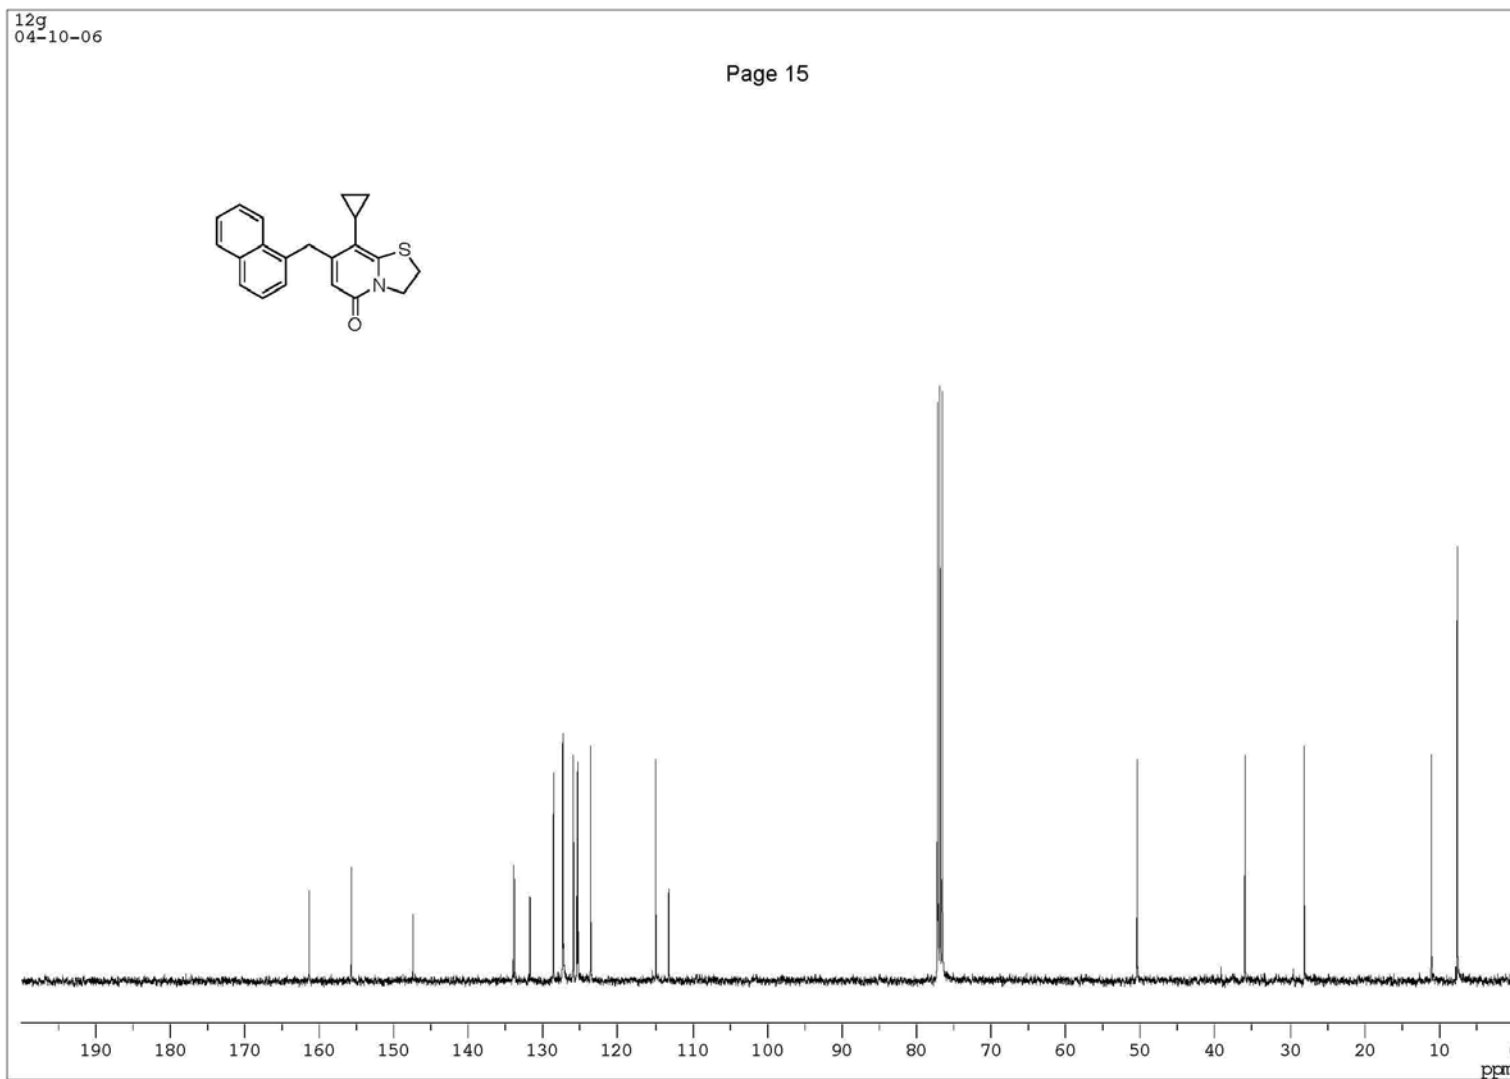

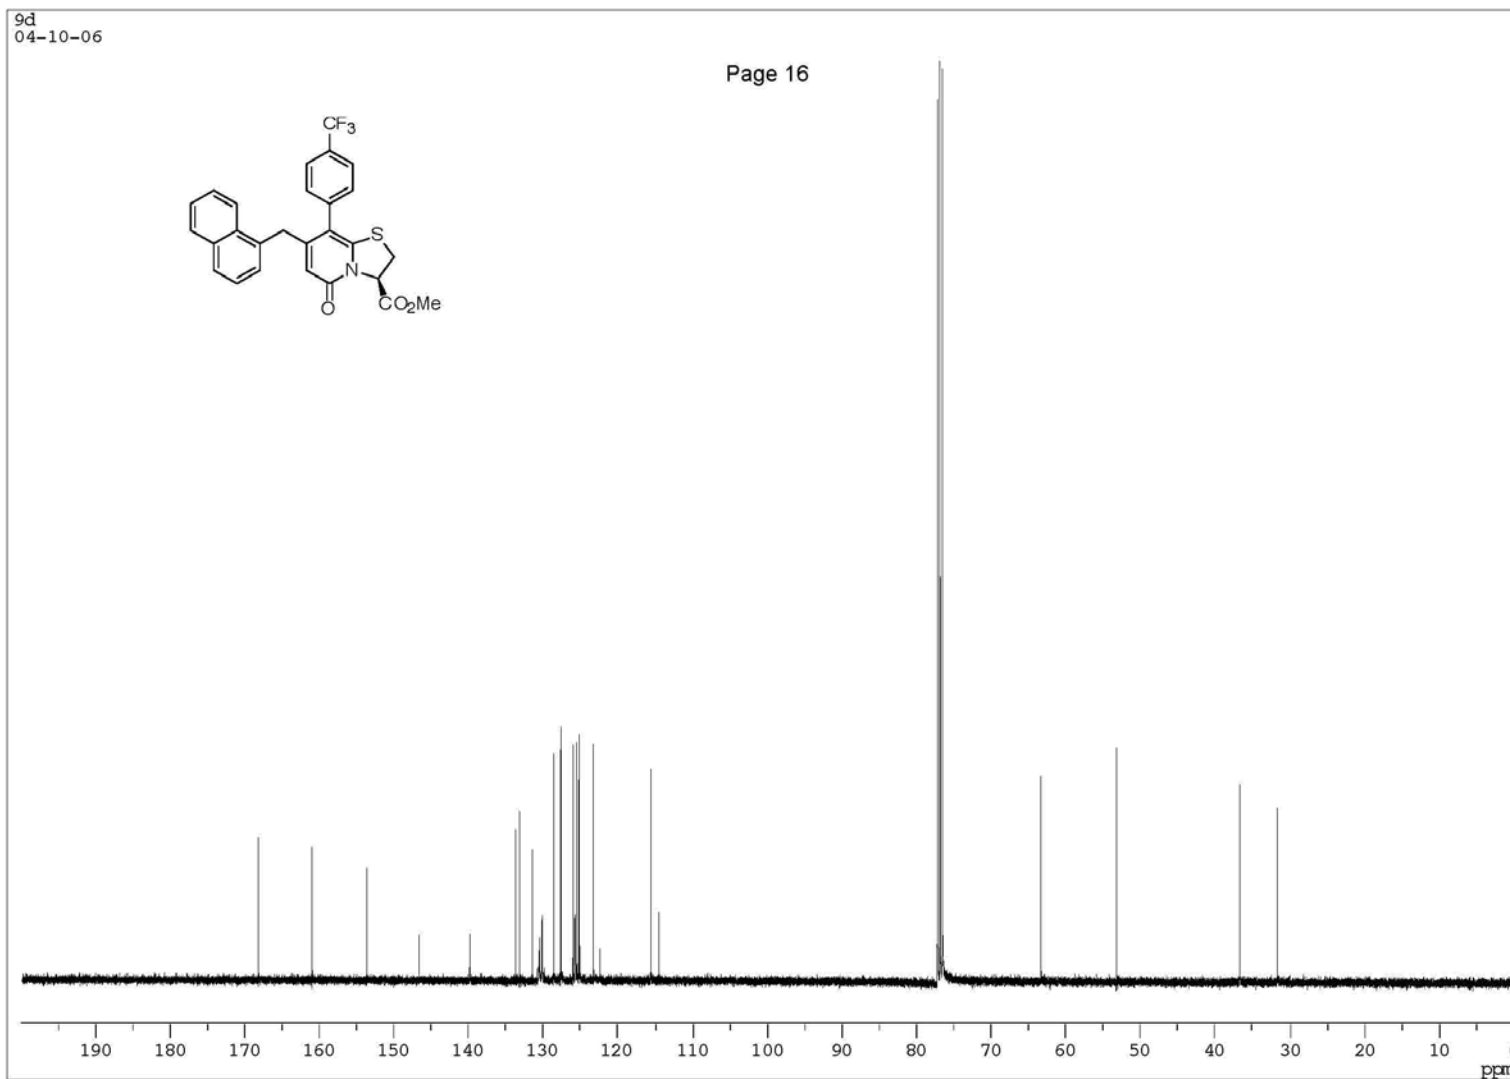



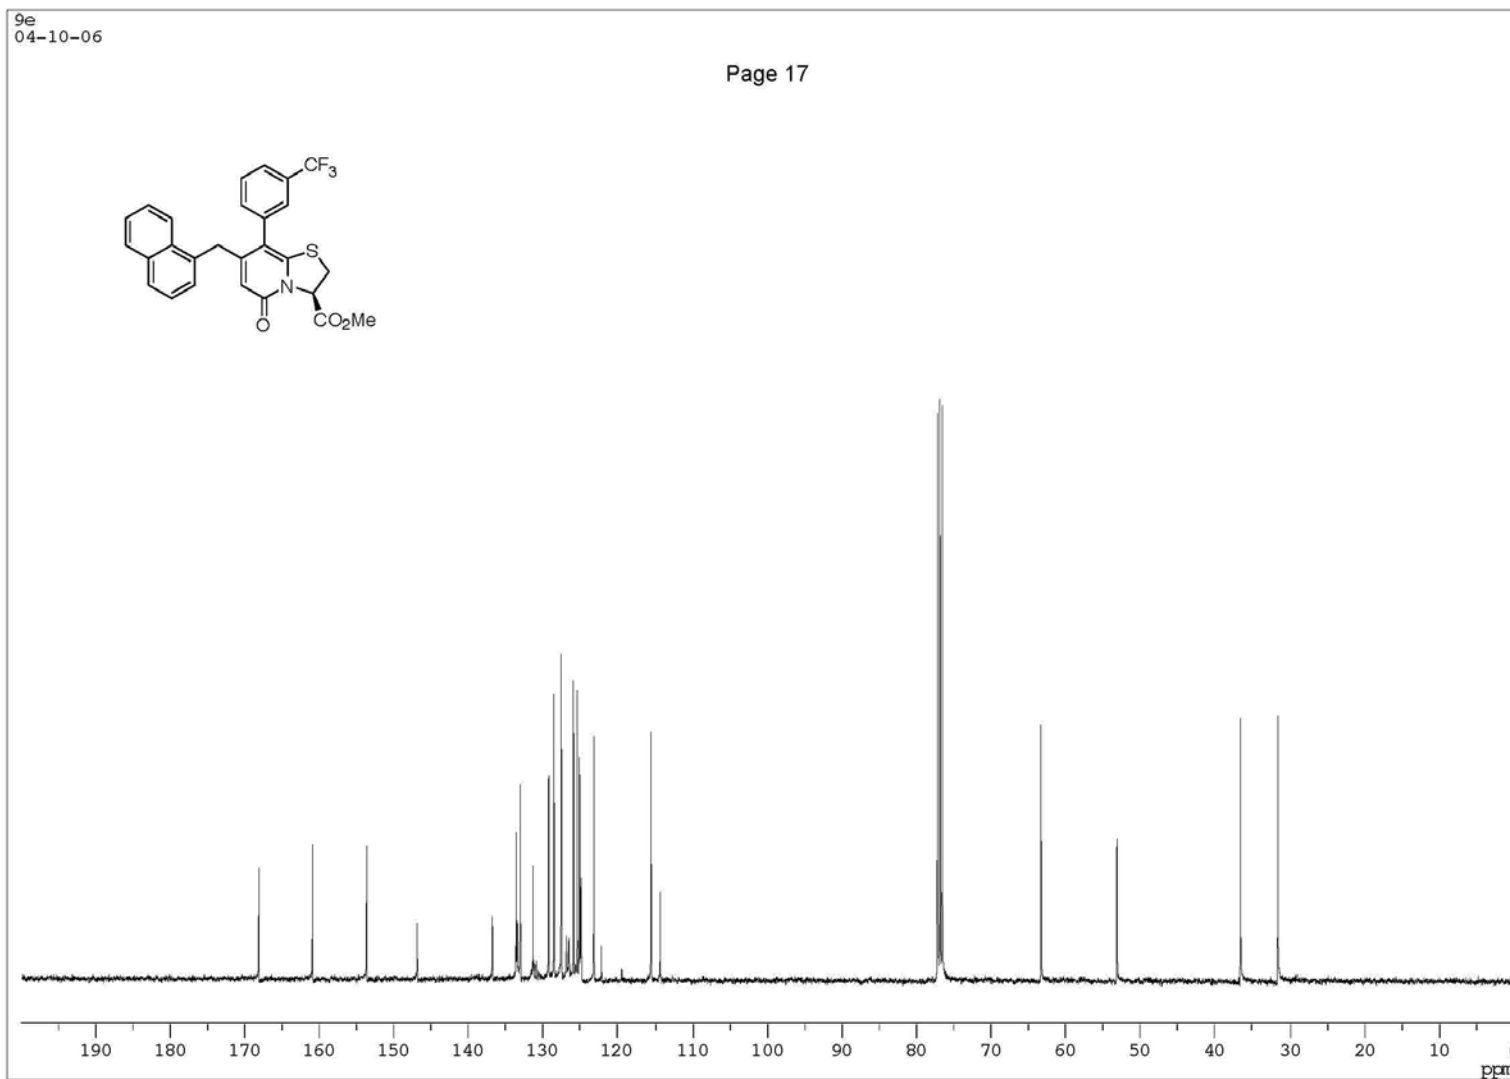

9f  
04-10-06

Page 18

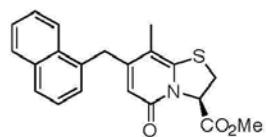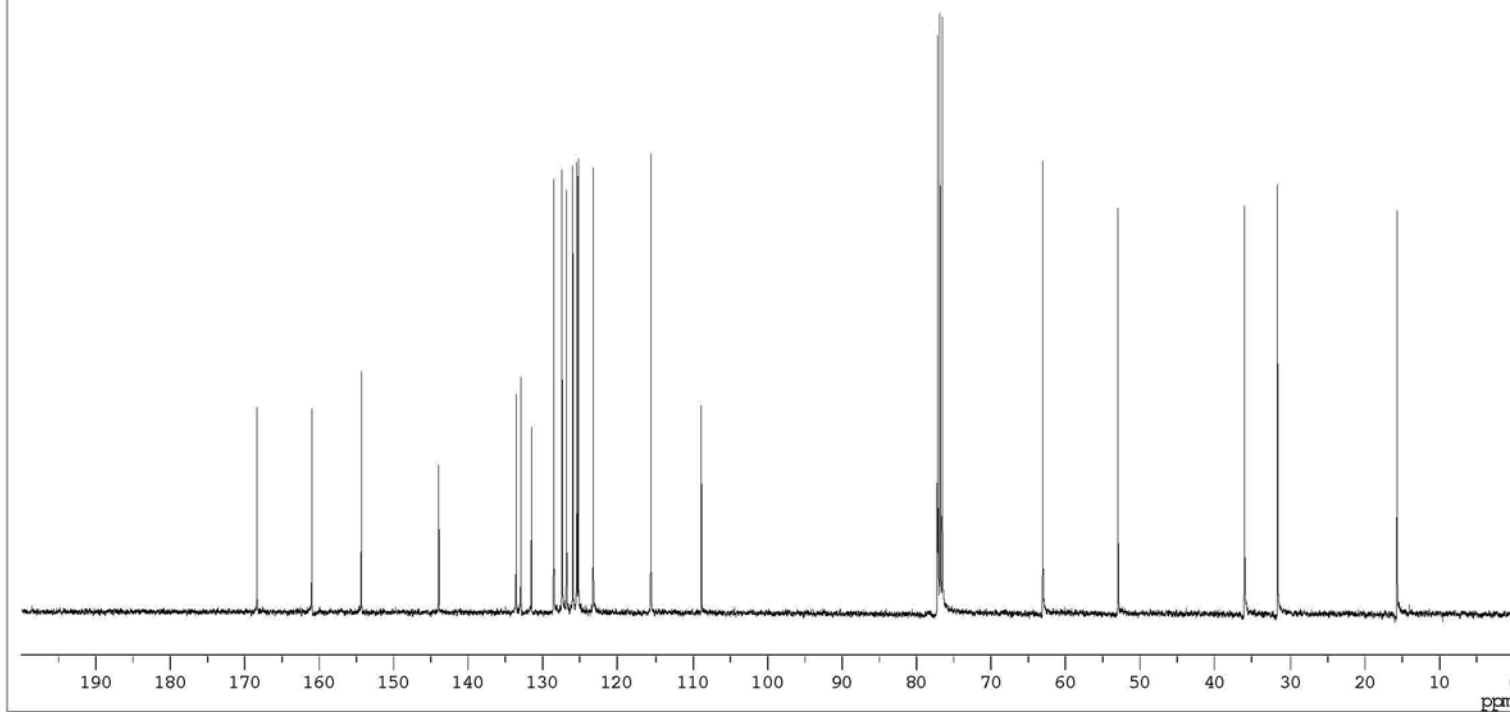

Supplement: b503294f.pdf [file b503294f.pdf]
